# Supplementary material
Source: PubMed Central journal article supplement (PMC5010972)
Supplement: NIHMS791208-supplement-supplement_1.pdf [file NIHMS791208-supplement-supplement_1.pdf]

**Supplementary Table 1.** Identified Stanniocalcin-1 peptides. Sequences along with peptide identification and quantification parameters have been indicated. Note, that when the peptide signal has fallen below the limit of peak integration (limit of quantification), the intensity values are presented as zeros.

| Peptide sequence        | Protein | UniProt ID | Missed cleavages | Mass, Da | Observed peptide charges | Posterior error probability of identification | Andromeda Identification Score | Intensity Secr1LH+2 | Intensity Secr1LH+8 | Intensity ratio, LH+8/+2, Secr1 | Intensity Secr2LH+2 | Intensity Secr2LH+7 | Intensity ratio, LH+8/+2, Secr2 |
|-------------------------|---------|------------|------------------|----------|--------------------------|-----------------------------------------------|--------------------------------|---------------------|---------------------|---------------------------------|---------------------|---------------------|---------------------------------|
| IGPNMASLFHILQTDHCAQTHPR | STC1    | P52823     | 0                | 2643.280 | 3,4,5                    | 3.33E-187                                     | 161.68                         | 0.0E+00             | 1.4E+07             | NA                              | 0.0E+00             | 1.4E+07             | NA                              |
| MIAEVQEECYSK            | STC1    | P52823     | 0                | 1485.648 | 2                        | 7.47E-07                                      | 96.745                         | 0.0E+00             | 1.5E+06             | NA                              | 0.0E+00             | 9.6E+05             | NA                              |
| NLRGEEDSPSHIK           | STC1    | P52823     | 1                | 1480.727 | 3                        | 1.26E-06                                      | 92.939                         | 1.8E+05             | 7.3E+05             | 4.0                             | 0.0E+00             | 5.6E+05             | NA                              |
| NLRGEEDSPSHIKR          | STC1    | P52823     | 2                | 1636.828 | 3                        | 2.60E-03                                      | 60.55                          | 0.0E+00             | 3.4E+05             | NA                              | 0.0E+00             | 1.4E+05             | NA                              |
| NPEAITEVVQLPNHFSNR      | STC1    | P52823     | 0                | 2064.039 | 2,3                      | 4.86E-181                                     | 176.69                         | 0.0E+00             | 3.9E+06             | NA                              | 0.0E+00             | 1.8E+06             | NA                              |
| RNPEAITEVVQLPNHFSNR     | STC1    | P52823     | 1                | 2220.140 | 3,4                      | 7.11E-168                                     | 177.08                         | 0.0E+00             | 1.2E+07             | NA                              | 0.0E+00             | 1.1E+07             | NA                              |
| SLECEDTVSTIR            | STC1    | P52823     | 0                | 1636.761 | 2,3                      | 5.30E-24                                      | 108.58                         | 0.0E+00             | 7.1E+06             | NA                              | 0.0E+00             | 5.4E+06             | NA                              |
| VAAQNSAEVVR             | STC1    | P52823     | 0                | 1142.604 | 2                        | 9.56E-04                                      | 89.266                         | 9.1E+05             | 1.2E+07             | 13.7                            | 7.0E+05             | 7.5E+06             | 10.7                            |

| Peptide sequence        | Intensity Secr3LH+2 | Intensity Secr3LH+9 | Intensity ratio, LH+8/+2, Secr3 | Intensity Secr4LH+2 | Intensity Secr4LH+8 | Intensity ratio, LH+8/+2, Secr4 | Intensity Secr5LH+2 | Intensity Secr5LH+8 | Intensity ratio, LH+8/+2, Secr5 | Intensity Secr6LH+2 | Intensity Secr6LH+8 | Intensity ratio, LH+8/+2, Secr6 |
|-------------------------|---------------------|---------------------|---------------------------------|---------------------|---------------------|---------------------------------|---------------------|---------------------|---------------------------------|---------------------|---------------------|---------------------------------|
| IGPNMASLFHILQTDHCAQTHPR | 0.0E+00             | 5.1E+06             | NA                              | 6.3E+05             | 8.7E+07             | 137.1                           | 0.0E+00             | 8.4E+06             | NA                              | 0.0E+00             | 3.1E+08             | NA                              |
| MIAEVQEECYSK            | 0.0E+00             | 6.5E+05             | NA                              | 0.0E+00             | 5.6E+06             | NA                              | 0.0E+00             | 1.6E+06             | NA                              | 0.0E+00             | 6.8E+07             | NA                              |
| NLRGEEDSPSHIK           | 0.0E+00             | 4.2E+05             | NA                              | 3.2E+05             | 2.9E+06             | 9.2                             | 2.6E+05             | 5.3E+05             | 2.0                             | 0.0E+00             | 3.6E+06             | NA                              |
| NLRGEEDSPSHIKR          | 0.0E+00             | 0.0E+00             | NA                              | 0.0E+00             | 1.4E+06             | NA                              | 0.0E+00             | 3.1E+05             | NA                              | 0.0E+00             | 2.6E+06             | NA                              |
| NPEAITEVVQLPNHFSNR      | 0.0E+00             | 0.0E+00             | NA                              | 0.0E+00             | 1.3E+07             | NA                              | 0.0E+00             | 1.3E+06             | NA                              | 0.0E+00             | 1.0E+08             | NA                              |
| RNPEAITEVVQLPNHFSNR     | 6.7E+05             | 6.4E+06             | 9.5                             | 0.0E+00             | 7.5E+07             | NA                              | 1.1E+06             | 1.4E+07             | 12.3                            | 1.8E+06             | 3.1E+08             | 169.2                           |
| SLECEDTVSTIR            | 0.0E+00             | 3.8E+06             | NA                              | 0.0E+00             | 6.9E+07             | NA                              | 6.3E+05             | 3.4E+06             | 5.4                             | 3.1E+06             | 2.2E+08             | 72.4                            |
| VAAQNSAEVVR             | 5.1E+05             | 5.2E+06             | 10.2                            | 9.9E+05             | 5.7E+07             | 57.2                            | 1.1E+06             | 1.3E+07             | 12.3                            | 3.7E+06             | 2.1E+08             | 55.9                            |
